# Supplementary material
Source: PubMed Central journal article supplement (PMC2567495)
Supplement: 0807339105_0807339105SI.pdf [file 0807339105_0807339105SI.pdf]

# Supporting Information

Lozupone *et al.* 10.1073/pnas.0807339105

## SI Methods

### Determining the Environmental Distribution of Sequenced Genomes.

To obtain information on the lifestyle of the isolate and its source, we looked at descriptive information from NCBI ([www.ncbi.nlm.nih.gov/genomes/lproks.cgi](http://www.ncbi.nlm.nih.gov/genomes/lproks.cgi)) and other related publications. We also determined which 16S rRNA-based environmental surveys of microbial assemblages deposited near-identical sequences in GenBank. We first downloaded the genv files from the NCBI ftp site on December 31, 2007, and used them to create a BLAST database. These files contain GenBank records for the ENV database, a component of the nonredundant nucleotide database (nt) where 16S rRNA environmental survey data are deposited. GenBank records for hits with >98% sequence identity over 400 bp to the 16S rRNA sequence of each of the 67 genomes were parsed to get a list of study titles associated with the hits. These study titles were used to evaluate the types of environments where close relatives of each of the 67 isolates had been found (Table S1 and Table S2).

**Generation and Evaluation of the 16S rRNA Consensus Tree.** 16S rRNA sequences were aligned with NAST (1) and hypervariable positions filtered out with lanemaskPH (2). This alignment was used to make 1,000 bootstrapped NJ trees using ClustalW and python code. The consensus tree was generated using the majority rule consensus method as implemented in PyCogent (3) and rooted between the Bacteria and the Archaea.

The 16S rRNA tree allowed us to evaluate the taxonomy of 21 newly sequenced genomes from the HGMI project. In accordance with previous studies that showed genera within the Firmicute class Clostridia to be extremely heterogeneous (4, 5), we found that some members of the genera *Clostridium*, *Rumi-*

*nococcus*, and *Eubacterium* grouped with members of other named genera with high bootstrap support (Fig. 1A). One reported member of the Bacteroidetes (*Bacteroides capillosus*) grouped firmly within the Firmicutes. This taxonomic error was not surprising because gut isolates have often been classified as Bacteroides based on an obligate anaerobe, Gram-negative, nonsporulating phenotype alone (6, 7). A more recent 16S rRNA-based analysis of the genus *Clostridium* defined phylogenetically related clusters (4, 5), and these designations were supported in our phylogenetic analysis of the *Clostridium* species in the HGMI pipeline. We thus designated these *Clostridium* species, along with the species from other named genera that cluster with them in bootstrap supported nodes, as being within these clusters.

**Annotation of GTs and GHs.** NCBI accessions for GTs and GHs were retrieved from the CAZy website at [www.cazy.org](http://www.cazy.org) (8). GT and GH annotations for the 21 human gut-derived genomes from the HGMI were obtained with an automated procedure followed by manual curation. In the automated procedure, the protein models are compared to a library of  $\approx 80,000$  previously annotated GH and GT functional module sequences using a combination of BLAST ( $E < 1e-6$ ) (9) and HMMER ( $E < 1e-6$ ) with HMM models (10) of families derived from the same library. Distantly related sequences (those with borderline E-values and poor alignment coverage) were manually inspected to ascertain the preservation of key functional elements and active site residues, when known. This procedure provided consistent results with annotations at the CAZy website.

Note that the two gut Archaeal genomes were excluded from the GH-based genome clustering analysis because neither had any GH genes.

1. DeSantis TZ, *et al.* (2006) NAST: A multiple sequence alignment server for comparative analysis of 16S rRNA genes. *Nucleic Acids Res* 34:394–399.
2. Hugenholtz P (2002) Exploring prokaryotic diversity in the genomic era. *Genome Biol* 3:1–8.
3. Knight R, *et al.* (2007) PyCogent: A toolkit for making sense from sequence. *Genome Biol* 8:R171.
4. Collins MD, *et al.* (1994) The phylogeny of the genus *Clostridium*: Proposal of five new genera and eleven new species combinations. *Int J Syst Bacteriol* 44:812–826.
5. Wiegel J, Tanner R, Rainey FA (2006) An introduction to the family Clostridiaceae. *Prokaryotes*, (Springer, New York), Vol 4, pp 654–678.
6. Farrow JAE, Lawson PA, Hippe H, Gauglitz U, Collins MD (1995) Phylogenetic evidence that the gram-negative nonsporulating bacterium *Tissierella* (Bacteroides) *preaeacuta* is a member of the Clostridium subphylum of the gram-positive bacteria and description of *Tissierella creatinini* sp nov. *Int J Syst Bacteriol* 45:436–440.
7. Jensen NS, Canale-Parola E (1985) Nutritionally limited pectinolytic bacteria from the human intestine. *Appl Environ Microbiol* 50:172–173.
8. Coutinho PM, Henrissat B (1999) Carbohydrate-active enzymes: An integrated database approach. *Recent Advances in Carbohydrate Bioengineering*, eds Gilbert HJ, Davies G, Henrissat B, Svensson B (The Royal Society of Chemistry, Cambridge), pp 3–12.
9. Altschul SF, Gish W, Miller W, Myers EW, Lipman DJ (1990) Basic local alignment search tool. *J Mol Biol* 215:403–410.
10. Eddy SR (1996) Hidden Markov models. *Curr Opin Struct Biol* 6:361–365.

Table S1. Sequenced genomes from the Human Gut Microbiome Initiative

| Full Name                                                            | Lineage                                | Environmental Distribution<br>(>98% ID hits to ncbi ENV<br>database) | Description/Original Isolation                                                                                   | RefSeq           |
|----------------------------------------------------------------------|----------------------------------------|----------------------------------------------------------------------|------------------------------------------------------------------------------------------------------------------|------------------|
| <b>Bacteria; Bacteroidetes; Bacteroidetes (class); Bacteroidales</b> |                                        |                                                                      |                                                                                                                  |                  |
| <i>Bacteroides caccae</i><br>ATCC 43185                              | Bacteroidaceae                         | Human gut                                                            | Normal human gut microbiota<br>and purported pathogenic<br>factor in inflammatory bowel<br>disease / Human feces | NZ_AAVM000000000 |
| <i>Bacteroides ovatus</i>                                            | Bacteroidaceae                         | Human gut                                                            | Normal human gut microbiota                                                                                      | NZ_AAXF000000000 |
| <i>Bacteroides stercoris</i>                                         | Bacteroidaceae                         | Human gut                                                            | Normal human gut microbiota /<br>Human feces                                                                     | NZ_ABFZ000000000 |
| <i>Bacteroides uniformis</i>                                         | Bacteroidaceae                         | None                                                                 | Normal human gut microbiota                                                                                      | NZ_AAYH000000000 |
| <i>Parabacteroides</i><br><i>merdae</i>                              | Porphyromonadaceae                     | Human gut                                                            | Normal human gut microbiota /<br>Human feces                                                                     | NZ_AAXE000000000 |
| <b>Bacteria; Actinobacteria; Coriobacteridae</b>                     |                                        |                                                                      |                                                                                                                  |                  |
| <i>Collinsella aerofaciens</i>                                       | Coriobacteriales;<br>Coriobacteriaceae | Human gut                                                            | Normal human gut microbiota /<br>Human feces                                                                     | NZ_AAVN000000000 |
| <b>Bacteria; Firmicutes; Mollicutes</b>                              |                                        |                                                                      |                                                                                                                  |                  |
| <i>Eubacterium dolichum</i><br>DSM 3991                              |                                        | Human gut                                                            | Normal human gut microbiota /<br>Human feces                                                                     | NZ_ABAW000000000 |
| <b>Bacteria; Firmicutes; Clostridia; Clostridiales</b>               |                                        |                                                                      |                                                                                                                  |                  |
| <i>Clostridium bolteae</i><br>ATCC BAA-613                           | Cluster XIVa                           | Human gut                                                            | Normal human gut microbiota /<br>Human feces                                                                     | NZ_ABCC000000000 |
| <i>Ruminococcus obeum</i><br>ATCC 29174                              | Cluster XIVa                           | Human and pig gut                                                    | Normal human gut microbiota /<br>Human feces                                                                     | NZ_AAVO000000000 |
| <i>Ruminococcus gnavus</i><br>ATCC 29149                             | Cluster XIVa                           | Human gut                                                            | Normal human gut microbiota /<br>Human feces                                                                     | NZ_AAYG000000000 |
| <i>Clostridium scindens</i><br>ATCC 35704                            | Cluster XIVa                           | Human and mouse gut                                                  | Normal human gut microbiota /<br>Human feces                                                                     | NZ_ABFY000000000 |
| <i>Dorea longicatena</i><br>DSM 13814                                | Cluster XIVa                           | Human gut                                                            | Normal human gut microbiota /<br>Human feces                                                                     | NZ_AAXB000000000 |
| <i>Ruminococcus torques</i><br>ATCC 27756                            | Cluster XIVa                           | Human gut                                                            | Normal human gut microbiota /<br>Human feces                                                                     | NZ_AAVP000000000 |
| <i>Eubacterium</i><br><i>ventriosum</i> ATCC<br>27560                | Cluster XIVa                           | Human gut                                                            | Normal human gut microbiota /<br>Human feces                                                                     | NZ_AAVL000000000 |
| <i>Coprococcus eutactus</i><br>ATCC 27759                            | Cluster XIVa                           | Human gut                                                            | Normal human gut microbiota /<br>Human feces                                                                     | NZ_ABEY000000000 |
| <i>Clostridium</i> sp. L2-50                                         | Cluster XIVa                           | Human gut                                                            | Normal human gut microbiota /<br>Human feces                                                                     | NZ_AAYW000000000 |
| <i>Peptostreptococcus</i><br><i>micros</i> ATCC 33270                | Peptostreptococcaceae                  | Human mouth, gut, and<br>lung                                        | Normal microbiota in human<br>mouth and gut: pathogen /<br>Lung infection                                        | NZ_ABEE000000000 |
| <i>Faecalibacterium</i><br><i>prausnitzii</i> M21/2                  | Cluster IV                             | Human and pig gut                                                    | Normal human microbiota flora<br>/ Human feces                                                                   | NZ_ABED000000000 |
| <i>Eubacterium siraeum</i><br>DSM 15702                              | Cluster IV                             | Human gut                                                            | Normal human gut microbiota /<br>Human feces                                                                     | NZ_ABCA000000000 |
| <i>Anaerotruncus</i><br><i>colihominis</i> DSM<br>17241              | Cluster IV                             | Human and avian gut                                                  | Normal human gut microbiota /<br>Human feces                                                                     | NZ_ABGD000000000 |
| <i>Bacteroides capillosus</i><br>ATCC 29799                          | Cluster IV                             | Human and turkey gut                                                 | Normal human gut microbiota:<br>human abscesses and wounds                                                       | NZ_AAXG000000000 |

**Table S2. Previously sequenced genomes included in the analysis**

| Full Name                                       | Lineage                                                      | Environmental Distribution (>98% ID hits to ncbi ENV database)           | Description/Original Isolation                                                       | Gut(G) Non-Gut(N) | RefSeq     |
|-------------------------------------------------|--------------------------------------------------------------|--------------------------------------------------------------------------|--------------------------------------------------------------------------------------|-------------------|------------|
| <b>Bacteria;Proteobacteria</b>                  |                                                              |                                                                          |                                                                                      |                   |            |
| <i>Escherichia coli</i> HS                      | Gammaproteobacteria; Enterobacteriales; Enterobacteriaceae   | Cosmopolitan in free-living communities and abundant in vertebrate gut   | Non-disease causing strain/Human gut                                                 | G                 | NC_009800  |
| <i>Pseudoalteromonas atlantica</i> T6c          | Gammaproteobacteria; Alteromonadales; Pseudoalteromonadaceae | Seawater                                                                 | Associated with marine biofilms and shell disease in shellfish/ Diseased crab shells | N                 | NC_008228  |
| <i>Shewanella frigidimarina</i> NCIMB 400       | Gammaproteobacteria; Alteromonadales; Shewanellaceae         | Marine water, ice, coral and saline lakes                                | Marine bacterium/Water from the North Sea                                            | N                 | NC_008345  |
| <i>Hahella chejuensis</i> KCTC 2396             | Gammaproteobacteria; Oceanospirillales; Hahellaceae          | Marine                                                                   | Marine/ Marine sediment                                                              | N                 | NC_007645  |
| <i>Alcanivorax borkumensis</i> SK2              | Gammaproteobacteria; Oceanospirillales; Alcanivoracaceae     | Marine sediment, water, and coral                                        | Marine/ Marine sediment                                                              | N                 | NC_008260  |
| <i>Roseobacter denitrificans</i> OCH 114        | Alphaproteobacteria; Rhodobacteriales; Rhodobacteraceae      | Diverse Saline Environments (Marine Ice, bacterioplankton, and sediment) | Marine anaerobe/ Marine sediment                                                     | N                 | NC_008209  |
| <i>Mesorhizobium</i> sp. BNC1                   | Alphaproteobacteria; Rhizobiales; Phyllobacteriaceae         | Soil, waste-water treatment                                              | Sewage / Sewage                                                                      | N                 | NC_008254  |
| <b>Bacteria;Bacteroidetes</b>                   |                                                              |                                                                          |                                                                                      |                   |            |
| <i>Parabacteroides distasonis</i> ATCC 8503     | Bacteroidetes (class); Bacteroidales; Porphyromonadaceae     | Vertebrate Gut                                                           | Human gut                                                                            | G                 | NC_009615  |
| <i>Bacteroides vulgatus</i> ATCC 8482           | Bacteroidetes (class); Bacteroidales; Bacteroidaceae         | Vertebrate Gut                                                           | Human gut / Human feces                                                              | G                 | NC_009614  |
| <i>Bacteroides thetaiotaomicron</i> VPI-5482    | Bacteroidetes (class); Bacteroidales; Bacteroidaceae         | Vertebrate Gut                                                           | Human gut / Feces of a healthy adult                                                 | G                 | NC_004663  |
| <i>Bacteroides fragilis</i> NCTC 9343           | Bacteroidetes (class); Bacteroidales; Bacteroidaceae         | Vertebrate Gut                                                           | Human gut: opportunistic pathogen                                                    | G                 | NC_003228  |
| <i>B. fragilis</i> YCH46                        | Bacteroidetes (class); Bacteroidales; Bacteroidaceae         | Vertebrate Gut                                                           | Human gut: opportunistic pathogen / patient with septicemia                          | G                 | NC_006347  |
| <i>Porphyromonas gingivalis</i> W83             | Bacteroidetes (class); Bacteroidales; Porphyromonadaceae     | Human mouth                                                              | Human mouth: associated with periodontal disease / human infection                   | N                 | NC_002950  |
| <i>Flavobacterium johnsoniae</i> UW101          | Flavobacteria; Flavobacteriales; Flavobacteriaceae           | Soil                                                                     | Common in soil and freshwater / Soil                                                 | N                 | NC_009441  |
| <i>Flavobacterium psychrophilum</i> JIPO2/86    | Flavobacteria; Flavobacteriales; Flavobacteriaceae           | Fish-associated; Marine and Glacial Ice                                  | Causes disease in salmonid fish / Kidney of a rainbow trout fry                      | N                 | NC_009613  |
| <i>Gramella forsetii</i> KT0803                 | Flavobacteria; Flavobacteriales; Flavobacteriaceae           | None                                                                     | Seawater / North Sea during a phytoplankton bloom                                    | N                 | NC_008571  |
| <i>Cytophaga hutchinsonii</i> ATCC 33406        | Sphingobacteria; Sphingobacteriales; Flexibacteraceae        | Soil                                                                     | Soil, freshwater, and marine habitats                                                | N                 | NC_008255  |
| <i>Salinibacter ruber</i> DSM 13855             | Sphingobacteria; Sphingobacteriales                          | Salt crust; hypersaline lake; Saltern                                    | Extremely halophilic aerobe / saltern crystallizer pond                              | N                 | NC_007677  |
| <b>Bacteria;Actinobacteria;Actinobacteridae</b> |                                                              |                                                                          |                                                                                      |                   |            |
| <i>Bifidobacterium adolescentis</i> ATCC 15703  | Bifidobacteriales; Bifidobacteriaceae                        | Human gut                                                                | Human gut commensal / infant feces                                                   | G                 | NC_0086181 |
| <i>Bifidobacterium longum</i> NCC2705           | Bifidobacteriales; Bifidobacteriaceae                        | Vertebrate gut and human vagina                                          | Gut probiotic/ infant feces                                                          | G                 | NC_004307  |

| Full Name                                               | Lineage                                                          | Environmental Distribution<br>(>98% ID hits to ncbi ENV<br>database) | Description/Original<br>Isolation                                                                       | Gut(G)<br>Non-Gut(N) | RefSeq    |
|---------------------------------------------------------|------------------------------------------------------------------|----------------------------------------------------------------------|---------------------------------------------------------------------------------------------------------|----------------------|-----------|
| <i>Leifsonia xyli</i> subsp. <i>xyli</i> str.<br>CTCB07 | Actinomycetales;<br>Micrococccineae;<br>Microbacteriaceae        | Cosmopolitan<br>free-living/plant-associated                         | Causes sugar-cane disease                                                                               | N                    | NC.006087 |
| <i>Propionibacterium acnes</i><br>KPA171202             | Actinomycetales;<br>Propionibacterineae;<br>Propionibacteriaceae | Cosmopolitan in free-living<br>communities                           | Causes acne/ human skin                                                                                 | N                    | NC.006085 |
| <i>Frankia</i> sp. <i>Ccl3</i>                          | Actinomycetales; Frankineae;<br>Frankiaceae                      | Plant-associated                                                     | nitrogen-fixing plant<br>commensal/root nodules                                                         | N                    | NC.007777 |
| <b>Bacteria;Firmicutes;Clostridia;Clostridiales</b>     |                                                                  |                                                                      |                                                                                                         |                      |           |
| <i>Clostridium thermocellum</i> ATCC<br>27405           | Clostridiaceae [Cluster IV]                                      | Compost                                                              | Thermophilic anaerobe that<br>degrades cellulose                                                        | N                    | NC.009012 |
| <i>Clostridium phytofermentans</i><br>ISDg              | Clostridiaceae [Cluster XIVa]                                    | None                                                                 | Anaerobe that degrades<br>cellulose/ forest soil                                                        | N                    | NC.010001 |
| <i>Clostridium acetobutylicum</i><br>ATCC 824           | Clostridiaceae [Cluster I]                                       | Industrial                                                           | Industrially important soil<br>bacterium/garden soil                                                    | N                    | NC.003030 |
| <i>Clostridium beijerinckii</i> NCIMB<br>8052           | Clostridiaceae [Cluster I]                                       | Soils and non-saline sediments;<br>many contaminated                 | Industrial production of<br>solvents                                                                    | N                    | NC.009617 |
| <i>Alkaliphilus metalliredigens</i><br>QYMF             | Clostridiaceae<br>[Peptostreptococaceae]                         | None                                                                 | alkiphilic, moderately<br>halophilic metal-reducing<br>bacterium/ borax leachate<br>ponds               | N                    | NC.009633 |
| <b>Bacteria;Firmicutes;Mollicutes</b>                   |                                                                  |                                                                      |                                                                                                         |                      |           |
| <i>Acholeplasma laidlawii</i> PG-8A                     | Acholeplasmatales;<br>Acholeplasmataceae                         | None                                                                 | Ubiquitous species of<br>mycoplasmas, in both<br>free-living and<br>animal-associated<br>communities    | N                    | NC.010163 |
| <b>Bacteria; Firmicutes;Lactobacillales;</b>            |                                                                  |                                                                      |                                                                                                         |                      |           |
| <i>Lactobacillus acidophilus</i> NCFM                   | Lactobacillaceae                                                 | Abundant in the vertebrate gut<br>and human vagina                   | Used for infant formula,<br>yogurt, and fluid milk<br>production/Human gut                              | G                    | NC.006814 |
| <i>Lactobacillus johnsonii</i> NCC 533                  | Lactobacillaceae                                                 | Predominantly in the vertebrate<br>gut but also the human vagina     | Human gut bacteria that<br>inhibits pathogens;<br>probiotic / Human gut                                 | G                    | NC.005362 |
| <i>Lactobacillus gasserii</i> ATCC<br>33323             | Lactobacillaceae                                                 | Predominantly in the vertebrate<br>gut but also the human vagina     | Major homofermentative<br>Lactobacillus in human<br>intestinal tract.                                   | G                    | NC.008530 |
| <i>Lactobacillus reuteri</i> F275                       | Lactobacillaceae                                                 | Vertebrate gut                                                       | Human gut bacteria that<br>inhibits pathogens;<br>probiotic / Human gut                                 | G                    | NC.009513 |
| <i>Lactobacillus salivarius</i> UCC118                  | Lactobacillaceae                                                 | Vertebrate gut                                                       | Human gut bacteria that<br>inhibits pathogens;<br>probiotic / Human gut                                 | G                    | NC.007929 |
| <i>Lactobacillus brevis</i> ATCC 367                    | Lactobacillaceae                                                 | Fermented food and household<br>waste                                | Starter culture for beer,<br>sourdough, and silage.                                                     | N                    | NC.008497 |
| <i>Oenococcus oeni</i> PSU-1                            |                                                                  | None                                                                 | Marshes; Used for secondary<br>fermentation in wine<br>production.                                      | N                    | NC.008528 |
| <b>Bacteria; Firmicutes;Bacillales</b>                  |                                                                  |                                                                      |                                                                                                         |                      |           |
| <i>Geobacillus kaustophilus</i><br>HTA426               | Bacillaceae                                                      | Deep sea sediments, soil,<br>petroleum reservoir                     | Moderate thermophile/ deep<br>sea sediment                                                              | N                    | NC.006510 |
| <i>Bacillus cereus</i> ATCC 14579                       | Bacillaceae                                                      | Mostly soil                                                          | Soil organism that can cause<br>food poisoning                                                          | N                    | NC.004722 |
| <i>Bacillus amyloliquefaciens</i> FZB42                 | Bacillaceae                                                      | Air, sediments, soil, subsurface                                     | Plant-growth-promoting<br>rhizosphere bacterium /<br>soil                                               | N                    | NC.009725 |
| <i>Bacillus clausii</i> KSM-K16                         | Bacillaceae                                                      | Air, termite gut                                                     | Used on industrial<br>production of alkaline<br>enzymes/ soil                                           | N                    | NC.006582 |
| <i>Bacillus halodurans</i> C-125                        | Bacillaceae                                                      | None                                                                 | Alkaliphilic organism used in<br>the industrial production<br>of $\beta$ -galactosidase and<br>xylanase | N                    | NC.002570 |

| Full Name                                                          | Lineage                                                        | Environmental Distribution<br>(>98% ID hits to ncbi ENV<br>database)                   | Description/Original<br>Isolation                                                                | Gut(G)<br>Non-Gut(N) | RefSeq    |
|--------------------------------------------------------------------|----------------------------------------------------------------|----------------------------------------------------------------------------------------|--------------------------------------------------------------------------------------------------|----------------------|-----------|
| <b>Archaea; Euryarchaeota;</b>                                     |                                                                |                                                                                        |                                                                                                  |                      |           |
| <i>Methanobrevibacter smithii</i><br>ATCC 35061                    | Methanobacteria;<br>Methanobacteriales;<br>Methanobacteriaceae | Sheep, cattle, and reindeer<br>rumen; sediment                                         | anaerobic soil and sediment,<br>and the gut of humans,<br>ruminants and other<br>animals/ sewage | G                    | NC.009515 |
| <i>Methanosphaera stadtmanae</i><br>DSM 3091                       | Methanobacteria;<br>Methanobacteriales;<br>Methanobacteriaceae | Vertebrate feces; sediment                                                             | Methanogenic / human feces                                                                       | G                    | NC.007681 |
| <i>Methanothermobacter<br/>thermautotrophicus str. Delta<br/>H</i> | Methanobacteria;<br>Methanobacteriales;<br>Methanobacteriaceae | Sludge digestors; petroleum<br>reservoirs; deep crustal fluid;<br>anoxic soil, compost | thermophilic, anaerobic<br>sewage sludge digestors /<br>sewage                                   | N                    | NC.000916 |
| <i>Methanocaldococcus jannaschii</i><br>DSM 2661                   | Methanococci;<br>Methanococcales;<br>Methanocaldococccaceae    | Hydrothermal vents; deep -sea<br>sediment                                              | obligately anaerobic<br>methane-producing<br>thermophile/ deep sea<br>vent                       | N                    | NC.000909 |
| <i>Methanococcoides burtonii</i> DSM<br>6242                       | Methanomicrobia;<br>Methanosarcinales;<br>Methanosarcinaceae   | Cold sediment from the ocean<br>and saline lakes                                       | Psychrotolerant,<br>methanogenic / anoxic<br>water in Ace Lake,<br>Antarctica                    | N                    | NC.007955 |

**Table S5. Comparison of GT and GH UPGMA clustering results to the 16S rRNA phylogeny**

| Cluster type  | Fraction shared nodes | Cluster parsimony count | 16S rRNA parsimony count | Probability better than phylogeny | Probability better than chance |
|---------------|-----------------------|-------------------------|--------------------------|-----------------------------------|--------------------------------|
| GT UniFrac UW | 0.46                  | 11                      | 13                       | $\leq 0.001$                      | $\leq 0.001$                   |
| GT UniFrac W  | 0.46                  | 10                      | 13                       | 0.001                             | $\leq 0.001$                   |
| GT Count UW   | 0.09                  | 14                      | 13                       | 0.99                              | $\leq 0.001$                   |
| GT Count W    | 0.03                  | 16                      | 13                       | 1.0                               | 0.003                          |
| GH UniFrac UW | 0.40                  | 9                       | 11                       | $\leq 0.001$                      | $\leq 0.001$                   |
| GH UniFrac W  | 0.31                  | 10                      | 11                       | 0.22                              | $\leq 0.001$                   |
| GH Count UW   | 0.10                  | 12                      | 11                       | 0.98                              | $\leq 0.001$                   |
| GH Count W    | 0.10                  | 13                      | 11                       | 1.0                               | 0.001                          |

UW, unweighted; W, weighted.

## Other Supporting Information Files

[Table S3](#)

[Table S4](#)
